# Supplementary material for: Oligonucleotide-based label-free Hg2+ assay with a monomer–excimer fluorescence switch
Source: Royal Society of Chemistry journal article supplement (doi:10.1039/c1an15465f), 2011-01-01
Supplement: c1an15465f.pdf [file c1an15465f.pdf]

## Oligonucleotide-Based Label-Free $\text{Hg}^{2+}$ Assay with a Monomer-Excimer Fluorescence Switch

Yongxiang Wang, Fenghua Geng, Qianli Cheng, Huiying Xu, Maotian Xu\*

Henan Key Laboratory Cultivation Base of Nanobiological Analytical Chemistry, College of  
Chemistry and Chemical Engineering, Shangqiu Normal University, Shangqiu, 476000, China

**Uv-vis Spectroscopic Experiment.** Different concentration of  $\text{Hg}^{2+}$  (0, 0.1, 0.3, 0.5, 1, 3, 5  $\mu\text{M}$ ) was added to 2 mL PBS solutions containing 2.5  $\mu\text{M}$  ThT and 5  $\mu\text{M}$  MSD. After incubation for 1 min, the Uv-vis absorption spectra were recorded immediately.

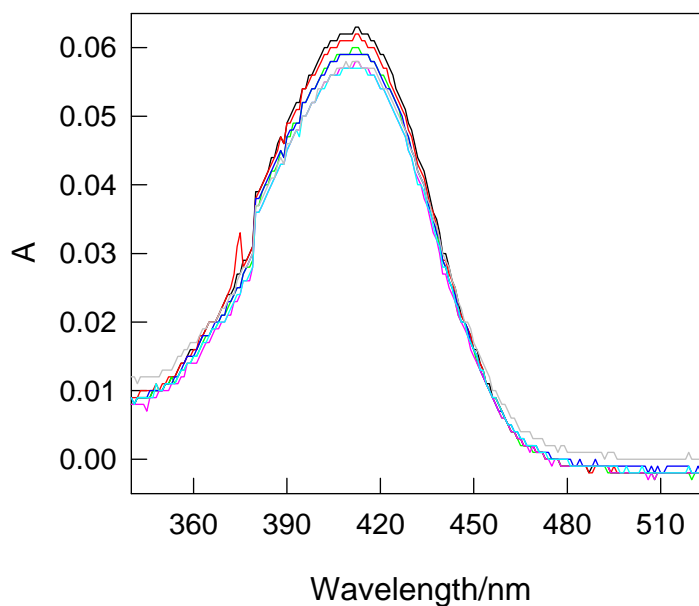

**Figure S1.** Effect of  $\text{Hg}^{2+}$  on the absorption spectra of *P*/ThT mixture.
